# Supplementary material for: Verification of SNPs Associated with Growth Traits in Two Populations of Farmed Atlantic Salmon
Source: PubMed Central journal article supplement (PMC4730252; doi:10.3390/ijms17010005), 2015-12-22
Supplement: ijms-17-00005-s001.pdf [file ijms-17-00005-s001.pdf]

# Supplementary Materials: Verification of SNPs Associated with Growth Traits in Two Populations of Farmed Atlantic Salmon

Hsin Y. Tsai, Alastair Hamilton, Derrick R. Guy, Alan E. Tinch, Steve C. Bishop and Ross D. Houston

**Supplementary Table 1.** The markers selected from GWA analysis for verification.

| Sources                           | Marker ID  | <i>p</i> -value *                                           | Marker and Flanking Sequence                                                                 |
|-----------------------------------|------------|-------------------------------------------------------------|----------------------------------------------------------------------------------------------|
| Top 0.5% SNPs<br>in growth traits | AX87956267 | 2.37 × 10 <sup>-3</sup> (L)/<br>1.45 × 10 <sup>-3</sup> (W) | CCATGTAGTTTTTGCATTCCAAAAGATCTTGCTGCM<br>AA GAGCTAATGATTATTACAGATATTATGTTATTT                 |
|                                   | AX88290778 | 7.27 × 10 <sup>-4</sup> (L)/<br>1.03 × 10 <sup>-3</sup> (W) | TGGCACTTTTCAAATATTGAATTGGAATTTCAAT <b>M</b> AT<br>GTCCTGAATTGACCATGGCTCTGGATAGAACT           |
|                                   | AX87963258 | 1.65 × 10 <sup>-5</sup> (L)/<br>1.42 × 10 <sup>-4</sup> (W) | CCTGTATGAGGGCAGCGAATGCTGGGTTCTGGAGGYT <b>G</b><br>GCATGAATACCTAGGAGAGAGAATGGTTGTATT          |
|                                   | AX88270804 | 1.32 × 10 <sup>-3</sup> (L)/<br>6.96 × 10 <sup>-4</sup> (W) | TCAGAGGTCTCGCTGGCGTCTCGTGAGACAGAGAG <b>R</b> G<br>GGTCGTTCCGCCACTGGGAGGTGAAAGAGGGCAA         |
|                                   | AX87944147 | 5.45 × 10 <sup>-5</sup> (L)/<br>2.78 × 10 <sup>-5</sup> (W) | CAGAGAGAGGGAGACCAGCGAGAGGGACACCAGAA<br><b>M</b> AAAAAGAAGGGAGGAAATTGAAGATGTTGCGGCGG          |
|                                   | AX87934338 | 7.30 × 10 <sup>-5</sup> (L)/<br>6.41 × 10 <sup>-5</sup> (W) | ATTTAGCCACAGGGCCTATCCTCCCATCCTTAGACY <b>G</b> G<br>CAGAGAGAGATGTAGGGAGACAAAGGCCTTCA          |
|                                   | AX87992121 | 2.67 × 10 <sup>-4</sup> (L)/<br>9.54 × 10 <sup>-5</sup> (W) | GAGCACTCCAACATTAATTTATT <b>C</b> AGGCATATTT <b>M</b> CA<br>GGACAAAGAGCAGAGGCCAGACCCTCCCGCCAC |
|                                   | AX87943138 | 4.82 × 10 <sup>-4</sup> (L)/<br>1.17 × 10 <sup>-4</sup> (W) | CACTTCAAGAGTTTACACGAAAAGTTGTTCTTAT <b>R</b> CG<br>GAAATTGCCTATTGAGCTTTCCTATTCATGTAT          |
|                                   | Chr. 20    | AX87998237                                                  | 5.70 × 10 <sup>-2</sup> (L)/<br>4.85 × 10 <sup>-2</sup> (W)                                  |
| AX88289827                        |            | 1.84 × 10 <sup>-2</sup> (L)                                 | TGGAATTGCCCCATACACTAATTACAAATGAAAG <b>M</b> G<br>GTCTCTAATCTGGTGCTTGTCCTTTGTAGTGTC           |
| Top 0.5%<br>in weight             | AX87888225 | 9.96 × 10 <sup>-5</sup>                                     | AATCTGACAGCGTTCTTTCTTTTACCCAGTCGGASAGG<br>CCTCCTGGCTGGGGGTGCAAGGGCAGTTCACA                   |
|                                   | AX88223695 | 1.24 × 10 <sup>-4</sup>                                     | GCCCTATCAGAGAGAAGGGGGGTGATGATAACAAYG<br>AGGTAGCTTTTCAATCAACAATCACTCTTTTA                     |
|                                   | AX87959413 | 1.25 × 10 <sup>-4</sup>                                     | CCCTTCATCGTATGGACTGACCATAAAAACCTGACYTA<br>CATCCAGACCGCCAAACGTCTGA <b>A</b> CTCCCGCA          |
| Top 0.5%<br>in length             | AX88141678 | 5.45 × 10 <sup>-5</sup>                                     | AGTTTTGGCTGGGGTAAGTAAAGGATACTTTCCA <b>A</b> RTA<br>TTTATCTTTTTTTAGAAGGCCTACTCTAATTTA         |
|                                   | AX87959512 | 9.13 × 10 <sup>-5</sup>                                     | CCCTTTCAAGCACACCTTTCTCAATAACCTGTGGCYAGT<br>TATTCACAATTTTTGATGAAGAAATAAGGTTT                  |
|                                   | AX88083269 | 1.02 × 10 <sup>-4</sup>                                     | TTCCAGAAGATCCAAGAGCTGATAGATGACAAGCARG<br>CTCTGGTGT <b>T</b> TCTCATCGATGAGGTAAAGCA            |

\* The *p*-value was given in Tsai *et al.* [14]. W, body weight; L, body length. The shadow is used to distinguish different sources of markers utilized in this study. The bold letter are the single nucleotide polymorphism used in this study.

**Supplementary Table 2.** The marker ID, *p*-value estimated by the GWA analysis, putative gene and flanking sequence of two informative SNPs. The results were given in Tsai *et al.* [14].

| Marker     | Genotype        | # No of Fish | Weight (g, SE)        | Length (mm, SE)       |
|------------|-----------------|--------------|-----------------------|-----------------------|
| AX88141678 | G/G             | 22           | 128.58 (5.20)         | 225.50 (3.48)         |
|            | A/G             | 240          | 115.26 (1.58)         | 216.93 (1.06)         |
|            | A/A             | 362          | 109.16 (1.22)         | 211.82 (0.81)         |
|            | PVE             |              | 0.06                  | 0.07                  |
|            | <i>p</i> -value |              | $4.12 \times 10^{-4}$ | $5.45 \times 10^{-5}$ |
| AX88270804 | G/G             | 153          | 119.25 (2.11)         | 218.54 (1.42)         |
|            | A/G             | 355          | 110.98 (1.08)         | 213.69 (0.72)         |
|            | A/A             | 116          | 106.25 (2.52)         | 210.50 (1.69)         |
|            | PVE             |              | 0.05                  | 0.04                  |
|            | <i>p</i> -value |              | $1.32 \times 10^{-3}$ | $6.69 \times 10^{-4}$ |
